# Supplementary material for: Spike in Asthma Healthcare Presentations in Eastern England during June 2021: A Retrospective Observational Study Using Syndromic Surveillance Data
Source: MDPI journal article supplement (doi:10.3390/ijerph182312353), 2021-11-24
Supplement: s1 [file s1]

## Supplementary figures

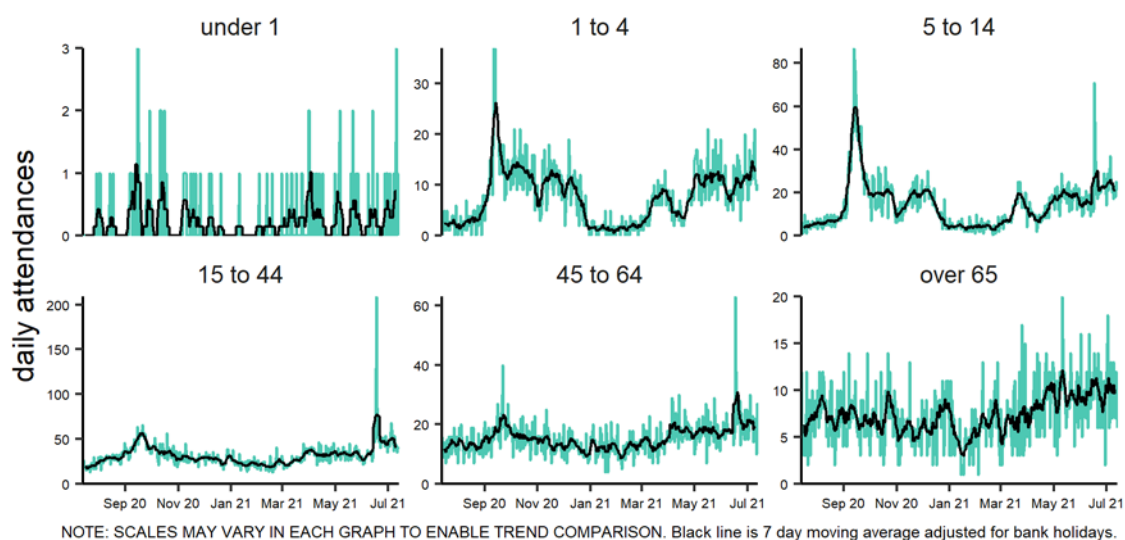

**Figure S1.** Emergency department asthma attendances (England) by age group (14/7/2020 – 13/7/2021).

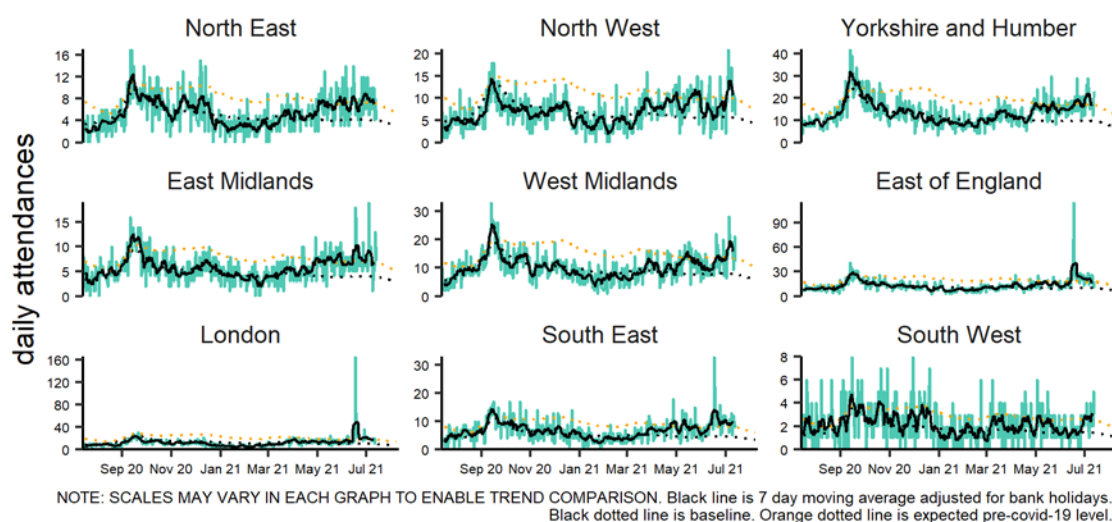

**Figure S2.** Emergency department asthma attendances (all ages) by region of England (14/7/2020 – 13/7/2021).

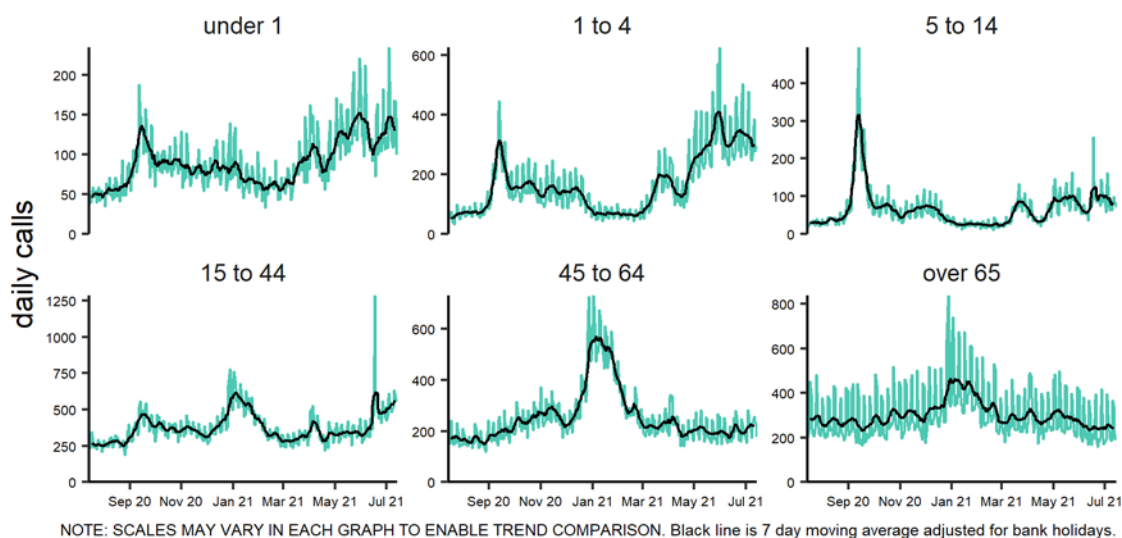

**Figure S3.** NHS 111 difficulty breathing calls (England) by age group (14/7/2020 – 13/7/2021).

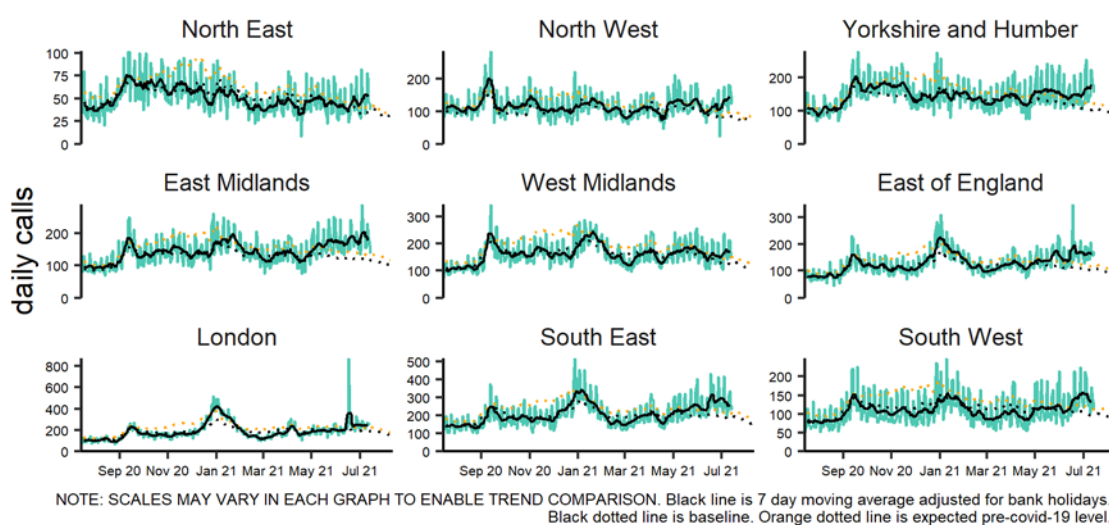

**Figure S4.** NHS 111 difficulty breathing calls (all ages) by region of England (14/7/2020 – 13/7/2021).

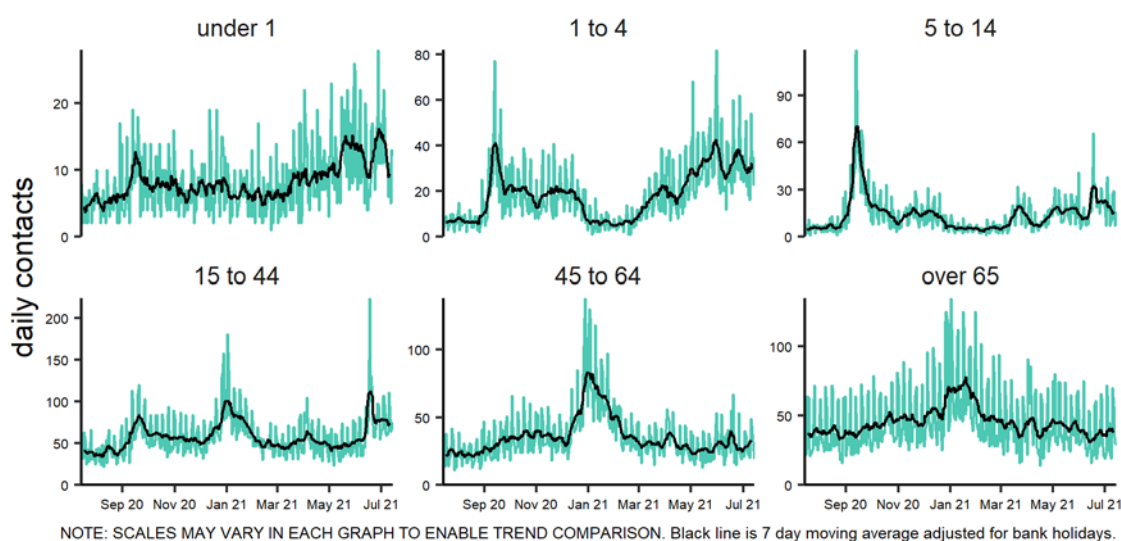

**Figure S5.** GP out of hours difficulty breathing/wheeze/asthma contacts (England) by age group (14/7/2020 – 13/7/2021).

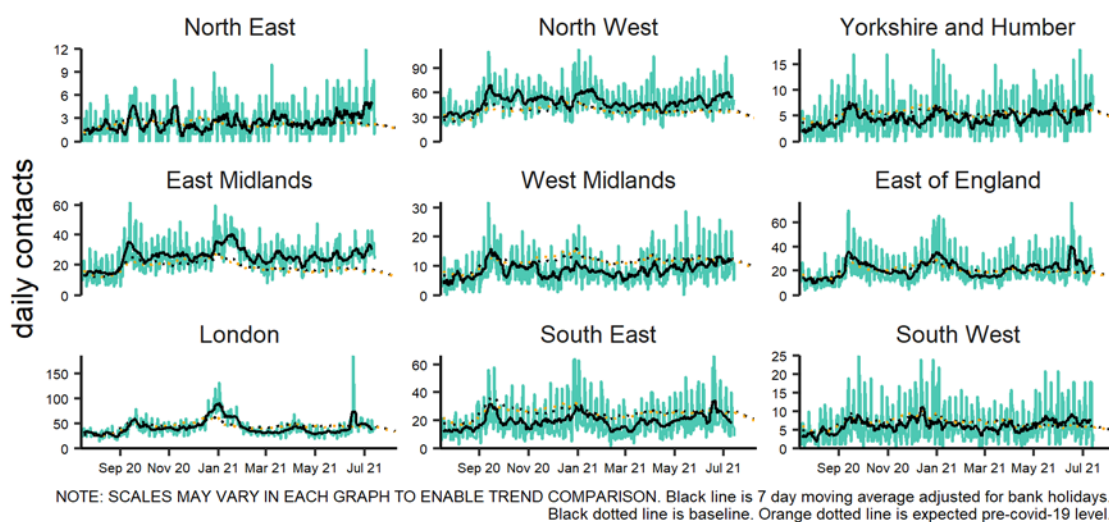

**Figure S6.** GP out of hours difficulty breathing/wheeze/asthma contacts (all ages) by region of England (14/7/2020 – 13/7/2021).

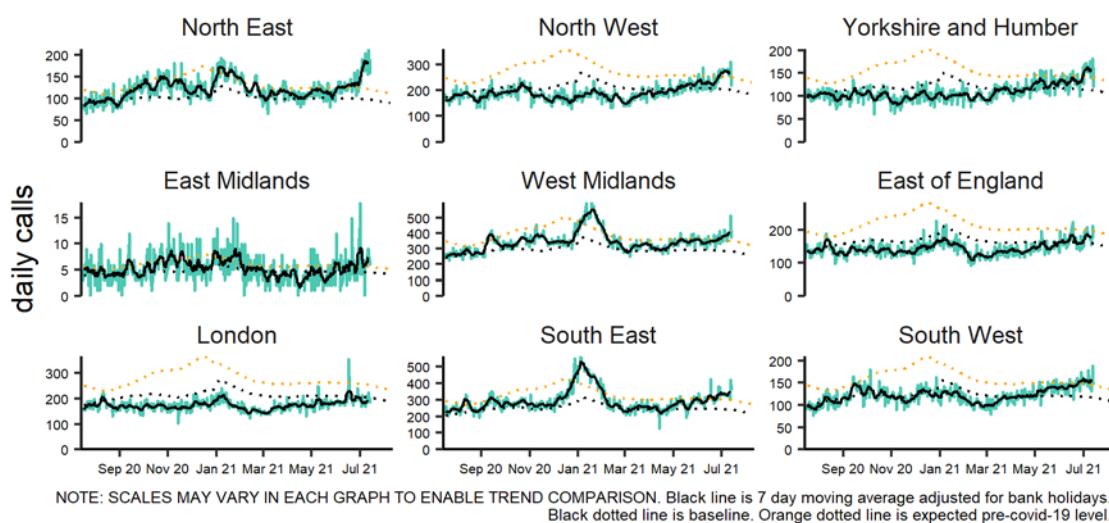

**Figure S7.** Ambulance breathing problems calls (all ages) by region of England (14/7/2020 – 13/7/2021).

## Supplementary tables

**Supplementary Table S1.** Clinical coding systems and diagnostic codes mapped to the syndromic asthma and difficulty breathing indicators used in this study.

### A. Emergency department: asthma

| Codes   Descriptor                                                                               | Coding system           |
|--------------------------------------------------------------------------------------------------|-------------------------|
| 195967001   Asthma (disorder)                                                                    | SnomedCT <sup>1,2</sup> |
| 304527002   Acute Asthma                                                                         | SnomedCT <sup>1,2</sup> |
| 708038006   Acute exacerbation of asthma (disorder)                                              | SnomedCT <sup>1,2</sup> |
| 281239006   Exacerbation of asthma (disorder)                                                    | SnomedCT <sup>1,2</sup> |
| 389145006   Allergic asthma                                                                      | SnomedCT <sup>1,2</sup> |
| 708090002   Acute severe exacerbation of asthma (disorder)                                       | SnomedCT <sup>1,2</sup> |
| 57546000   Asthma with status asthmaticus (disorder)                                             | SnomedCT <sup>1,2</sup> |
| 233678006   Childhood asthma (disorder)                                                          | SnomedCT <sup>1,2</sup> |
| 445427006   Seasonal asthma (disorder)                                                           | SnomedCT <sup>1,2</sup> |
| 394967008   Suspected asthma (situation)                                                         | SnomedCT <sup>1,2</sup> |
| 708093000   Acute exacerbation of allergic asthma                                                | SnomedCT <sup>1,2</sup> |
| 1751000119100   Acute exacerbation of chronic obstructive airways disease with asthma (disorder) | SnomedCT <sup>1,2</sup> |

### B. General practitioner out of hours: difficulty breathing/wheeze/asthma

| Codes   Descriptor                   | Coding system         |
|--------------------------------------|-----------------------|
| H333.   Acute exacerbation of asthma | Read CTV <sup>3</sup> |
| H33..   Asthma                       | Read CTV <sup>3</sup> |
| H33z.   Asthma unspecified           | Read CTV <sup>3</sup> |
| 173..   Breathlessness               | Read CTV <sup>3</sup> |
| 23B2.   Bronchial breathing          | Read CTV <sup>3</sup> |
| 1738.   Difficulty breathing         | Read CTV <sup>3</sup> |
| 2322.   Dyspnoea                     | Read CTV <sup>3</sup> |
| 2326.   Expiratory wheeze            | Read CTV <sup>3</sup> |
| 232C.   Noisy breathing              | Read CTV <sup>3</sup> |
| R061.   Stridor                      | Read CTV <sup>3</sup> |
| 1737.   Wheezing                     | Read CTV <sup>3</sup> |

### C. NHS 111 calls and online assessments: difficulty breathing

| Descriptor                   | Code system               |
|------------------------------|---------------------------|
| Difficulty breathing pathway | NHS Pathways <sup>4</sup> |

### D. Ambulance: breathing problems

| Descriptor                         | Code system                                                    |
|------------------------------------|----------------------------------------------------------------|
| Breathing problems chief complaint | NHS Pathways                                                   |
| Breathing problems chief complaint | Advanced Medical Priority Dispatch System (AMDPS) <sup>5</sup> |

<sup>1</sup>SNOMED CT 2012. International Health Terminology Standards Development Organisation. Available online: <http://www.ihtsdo.org/snomed-ct/>; <sup>2</sup>Emergency Care Dataset. NHS Digital. Available online: <https://digital.nhs.uk/data-and-information/data-collections-and-data-sets/data-sets/emergency-care-data-set-ecds>; <sup>3</sup>Read codes. NHS Digital. Available online: <https://digital.nhs.uk/services/terminology-and-classifications/read-codes>; <sup>4</sup>NHS Pathways. NHS Digital. Available online: <https://digital.nhs.uk/services/nhs-pathways>; <sup>5</sup>Ambulance Response Programme. University of Sheffield. Available online: [https://www.england.nhs.uk/wp-content/uploads/2017/07/ARPreport\\_Final.pdf](https://www.england.nhs.uk/wp-content/uploads/2017/07/ARPreport_Final.pdf). all accessed on 23 November 2021.

**Supplementary Table S2.** Observed and expected cases of asthma and difficulty breathing across age groups 17 June 2021.

| Syndromic system     | Indicator                            | <1               |                  |                    | 1-4 |     |       | 5-14 |     |       | 15-44 |      |       | 45-64 |     |       | 65+ |     |       |
|----------------------|--------------------------------------|------------------|------------------|--------------------|-----|-----|-------|------|-----|-------|-------|------|-------|-------|-----|-------|-----|-----|-------|
|                      |                                      | Exp <sup>1</sup> | Obs <sup>2</sup> | % inc <sup>3</sup> | Exp | Obs | % inc | Exp  | Obs | % inc | Exp   | Obs  | % inc | Exp   | Obs | % inc | Exp | Obs | % inc |
| Emergency department | Asthma                               | 0                | 0                | -100               | 13  | 19  | 43    | 19   | 76  | 292   | 47    | 165  | 248   | 21    | 61  | 187   | 13  | 13  | 2     |
| NHS 111 calls        | Difficulty breathing                 | 124              | 103              | -17                | 313 | 250 | -20   | 69   | 256 | 270   | 349   | 1286 | 268   | 175   | 251 | 44    | 220 | 217 | -1    |
| NHS 111 online       | Difficulty breathing                 | N/A <sup>4</sup> | N/A              | N/A                | N/A | N/A | N/A   | N/A  | N/A | N/A   | N/A   | N/A  | N/A   | N/A   | N/A | N/A   | N/A | N/A | N/A   |
| GP out of hours      | Difficulty breathing/ wheeze/ asthma | 10               | 6                | -41                | 29  | 22  | -24   | 15   | 66  | 347   | 49    | 224  | 354   | 25    | 53  | 112   | 32  | 23  | -28   |
| Ambulance            | Breathing problems                   | N/A              | N/A              | N/A                | N/A | N/A | N/A   | N/A  | N/A | N/A   | N/A   | N/A  | N/A   | N/A   | N/A | N/A   | N/A | N/A | N/A   |

<sup>1</sup>'expected' – number of daily counts expected on a weekday (Monday to Friday) based upon activity recorded in the preceding four weeks (weekdays inclusive through 24 May to 16 June 2021); <sup>2</sup>'observed' – average number of daily counts observed based upon activity on 17 June 2021; <sup>3</sup>'percentage increase' observed on 17 June 2021; <sup>4</sup>N/A – age specific data not available for the NHS 111 online and ambulance surveillance systems.
